# Supplementary material for: On the mechanism of intermolecular nitrogen-atom transfer from a lattice-isolated diruthenium nitride intermediate
Source: Royal Society of Chemistry journal article supplement (doi:10.1039/d2fd00167e), 2022-12-22
Supplement: d2fd00167e1.pdf [file d2fd00167e1.pdf]

## Supporting Information

### **On the Mechanism of Intermolecular Nitrogen-Atom Transfer from a Lattice-Isolated Diruthenium Nitride Intermediate**

Mario Cosio,<sup>#,1</sup> Waad S. Alharbi,<sup>#,2,3</sup> Aishanee Sur,<sup>1</sup> Chen-Hao Wang,<sup>1</sup> Ahmad Najafian,<sup>2</sup> Thomas R. Cundari,<sup>2,\*</sup> and David C. Powers<sup>1,\*</sup>

<sup>#</sup>authors contributed equally to this work

<sup>1</sup>Department of Chemistry, Texas A&M University, College Station, Texas 77843-3255, USA

<sup>2</sup>Department of Chemistry, Center of Advanced Scientific Computing and Modeling (CASCaM), University of North Texas, 1155 Union Circle, #305070, Denton, Texas 76203-5017, USA

<sup>3</sup>Chemistry Department, Science College, University of Jeddah, Jeddah, KSA.

Correspondence: [thomas.cundari@unt.edu](mailto:thomas.cundari@unt.edu), [powers@chem.tamu.edu](mailto:powers@chem.tamu.edu)

## Table of Contents

|                                           |     |
|-------------------------------------------|-----|
| A. General Considerations                 | S3  |
| B. Synthesis and Characterization         | S5  |
| C. Supporting Data                        | S6  |
| D. X-ray Experimental Details of <b>3</b> | S9  |
| E. Computational Data                     | S10 |
| F. References                             | S28 |

## A. General Considerations

**Materials** Unless otherwise noted, all reactions were carried out under ambient atmosphere at 23 °C using as-received reagents. MeCN was obtained as ACS reagent grade, chlorobenzene was obtained from BTC, and NMR solvents were purchased from Cambridge Isotope Laboratories. H<sub>2</sub>esp was prepared according to literature procedures.<sup>1</sup>

**Characterization Details** NMR spectra were recorded on Varian Inova 500 (<sup>1</sup>H NMR, 499.43 MHz) at 25 °C and spectra were referenced against residual solvent signals: CD<sub>3</sub>CN (1.94 ppm, <sup>1</sup>H).<sup>2</sup> <sup>1</sup>H NMR data are reported as follows: chemical shift ( $\delta$ , ppm), multiplicity (s (singlet), d (doublet), t (triplet), m (multiplet), br (broad), integration. *In situ* IR spectra were measured in a KBr pellet with a Bruker VERTEX 70, were blanked against air, and were determined as the average of 64 scans. IR data are reported as follows: wavenumber (cm<sup>-1</sup>), peak intensity (s, strong; m, medium; w, weak).

**Powder X-ray Diffraction (PXRD)** PXRD measurements were carried out on a Bruker D8 Advance Eco X-ray diffractometer (Cu K $\alpha$ , 1.5418 Å; 40 kV, 25 mA) fitted with a LynxEye detector. The angular range was measured from 5.00 to 30.00° or 3.00 to 25.00° (2 $\theta$ ) with steps of 0.010° and a measurement time of 0.3 second per step.

**Single-Crystal X-Ray Diffraction Details** A Bruker APEX 2 Duo X-ray (three-circle) diffractometer was used for crystal screening, unit cell determination, and data collection for the X-ray crystal structure of **3**. Crystal suitable for X-ray diffraction were mounted on a MiTeGen dual-thickness micro-mount and placed under a 110 K N<sub>2</sub> stream (Oxford). The X-ray radiation employed was generated from a Mo sealed X-ray tube (K $\alpha$  = 0.70173 Å with a potential of 40 kV and a current of 40 mA). Bruker AXS APEX II software was used for data collection and reduction. Absorption corrections were applied using SADABS.<sup>3</sup> A solution was obtained using XT/XS in APEX2 and refined in Olex2.<sup>4-6</sup> Hydrogen atoms were placed in idealized positions and were set riding on the respective parent atoms. All non-hydrogen atoms were refined with anisotropic thermal parameters. The structure was refined (weighted least squares refinement on F<sup>2</sup>) to convergence.<sup>4</sup>

**Computational Methods** Free energies of stationary points for modeled reaction routes were calculated using density functional theory (DFT) within the Gaussian 16 software package,<sup>7</sup> and visualization of optimized structures was made using ChemCraft.<sup>8</sup>

Reaction species were geometry optimized with the B3LYP<sup>9</sup> functional including the GD3<sup>10</sup> dispersion correction term with two basis sets: def2-TZVP<sup>11</sup> for Ru, N and O and def2-SVP<sup>11</sup> for C and H. Two spin states, low (doublet) and intermediate (quartet) were evaluated for reactants, transition states, intermediates and products of all pertinent species; test calculations suggested that sextet spin states were much higher in energy. The lowest free energy spin multiplicities were selected to calculate the thermodynamics,  $\Delta G_{\text{rxn}}$ , and free energy barriers,  $\Delta G^\ddagger$ , to study the mechanisms of reaction. Solvation effects were obtained from single-point gas-phase optimized geometries using the SMD solvation model<sup>9, 12</sup> with toluene ( $\epsilon \sim 2.37$ ) as the continuum solvent. Free energies are calculated in Kcal mol<sup>-1</sup> and corrections to the electronic energy assumed 1 atm and 298.15 K.

The analytic Hessian was used to identify the correct number of imaginary frequencies for all optimized species. Ground states are characterized by possession of no imaginary frequencies, and transition states have one imaginary frequency via harmonic frequency calculations. Changing magnetic properties of optimized stationary points were examined via spin density maps for these species in their various spin states.

## B. Synthesis and Characterization

### Synthesis of Ru(esp)<sub>2</sub>Cl

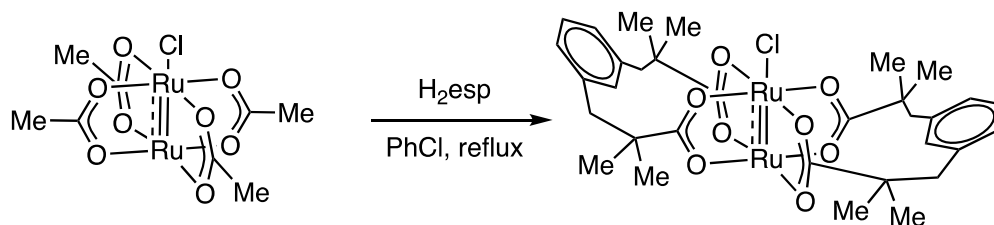

Ru<sub>2</sub>(esp)<sub>2</sub>Cl was prepared by a method similar to that reported by Musaev and Dubois.<sup>13</sup> In a 50-mL round bottom flask equipped with a condenser, Ru<sub>2</sub>(OAc)<sub>4</sub>Cl (200 mg, 0.422 mmol) and H<sub>2</sub>esp (300 mg, 1.08 mmol) were refluxed in chlorobenzene (20 mL) for 18 h. The reaction was cooled to 23 °C and placed in a freezer (-22 °C) to promote the precipitation of the product. The mixture was then filtered through a frit and the solids washed with chlorobenzene then diethyl ether before drying under reduced pressure to afford a red solid (277 mg, 0.351 mmol, 83% yield). Characterization is consistent with previously reported data.<sup>13</sup>

### Synthesis of Ru<sub>2</sub>(esp)<sub>2</sub>N<sub>3</sub> (3)

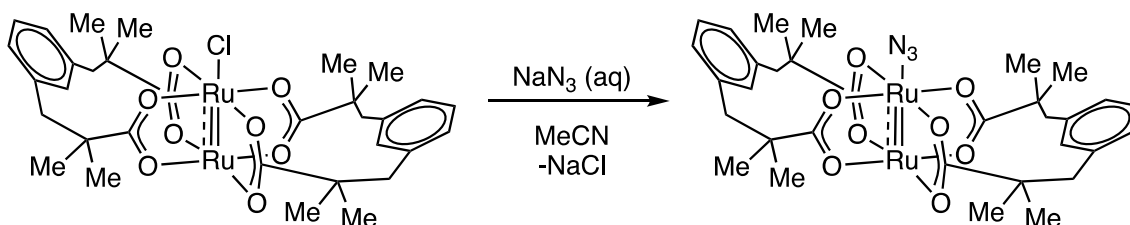

To a mixture of Ru<sub>2</sub>(esp)<sub>2</sub>Cl (15 mg, 0.019 mmol) in MeCN (5 mL), an aqueous solution of NaN<sub>3</sub> (1.5 mg NaN<sub>3</sub> in 0.37 mL H<sub>2</sub>O, 0.023 mmol) was added. The mixture immediately darkened and became homogenous. Volatiles were removed under reduced pressure at 23 °C. Acetone was added to the residue and the mixture was filtered into a pre-weighed 20 mL vial and dried under reduced pressure at 23 °C. Yield: 11 mg (0.014 mmol, 73% yield). IR  $\nu(\text{N}_3)$ : 2000 (s), 2020(s) cm<sup>-1</sup> (KBr). <sup>1</sup>H NMR (499.43 MHz, d<sub>6</sub>-DMSO):  $\delta$  32.58, 13.18, 12.15, 11.08, 8.48 (all peaks are broad and featureless. NMR shifts are in good agreement with previously reported Ru<sub>2</sub>(esp)<sub>2</sub>SbF<sub>6</sub>).<sup>13</sup> Single-crystals suitable for single-crystal X-ray diffraction were grown by blowing a stream of N<sub>2</sub> over a DMF solution of 3.

## C. Supporting Data

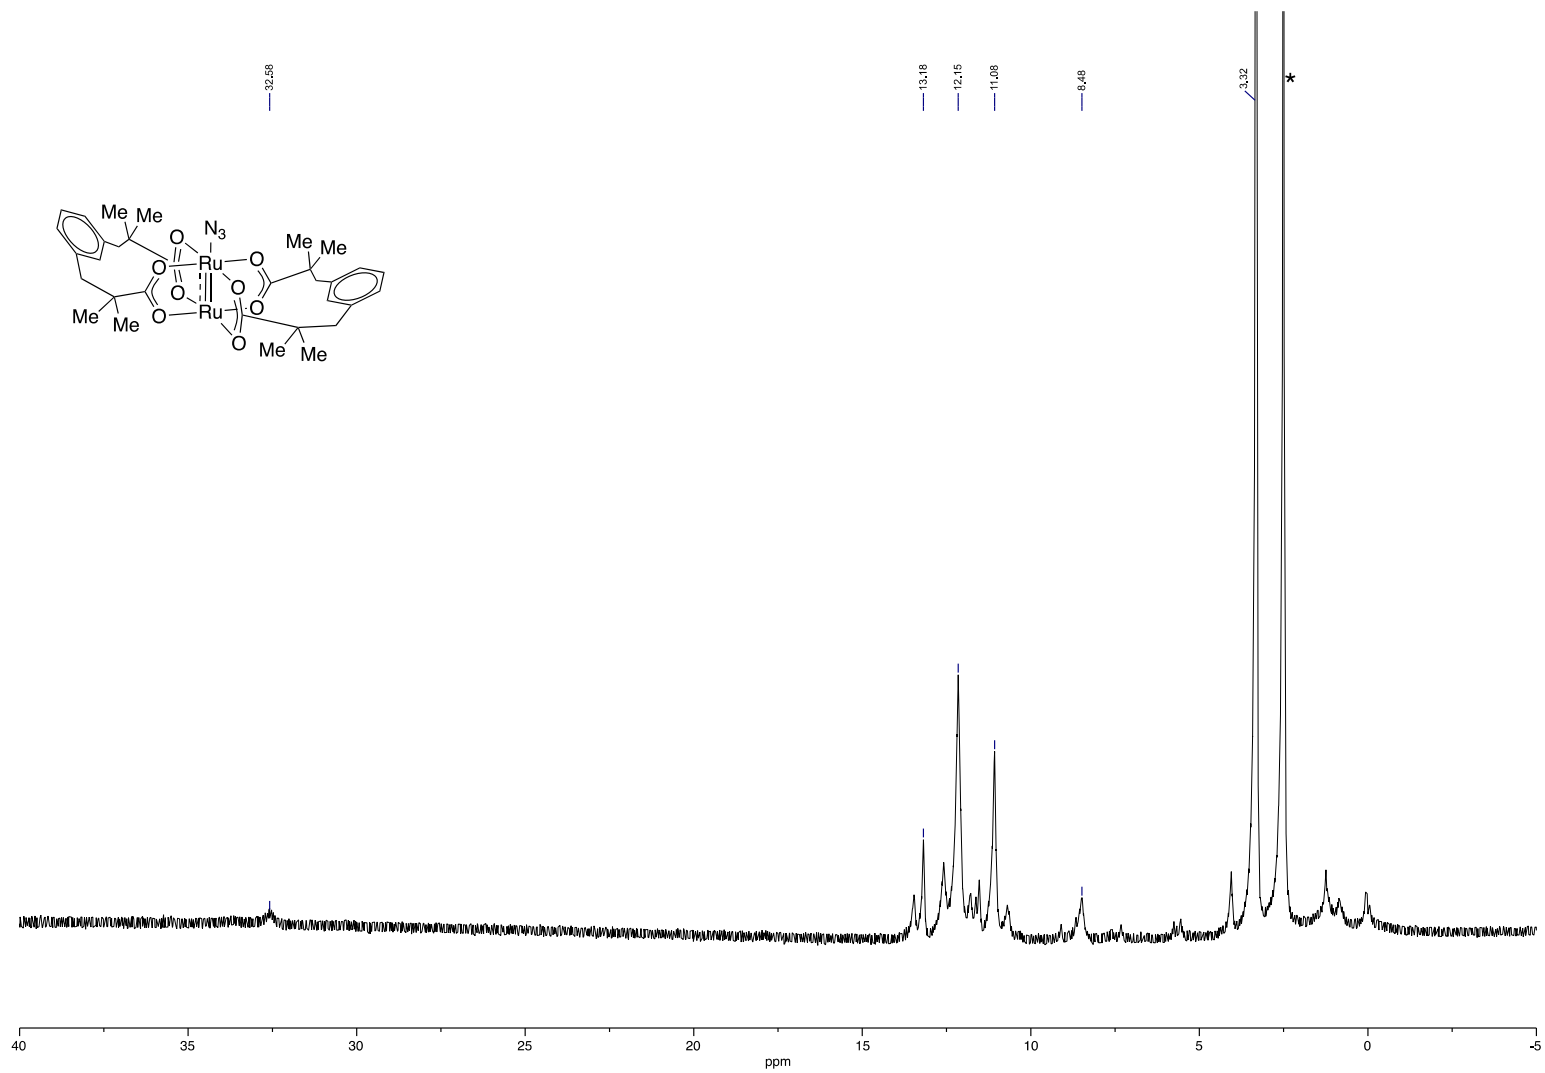

**Figure S1.** <sup>1</sup>H NMR spectrum of **3** in d<sub>6</sub>-DMSO (499.43 MHz) at 25 °C. Residual solvent peak (d<sub>5</sub>-DMSO) is marked with \*.

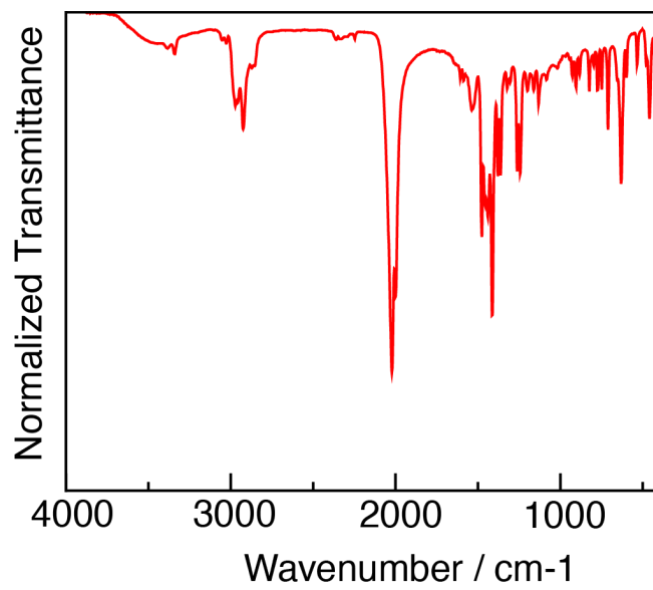

**Figure S2.** Solid state IR spectrum of a KBr pellet of **3**.

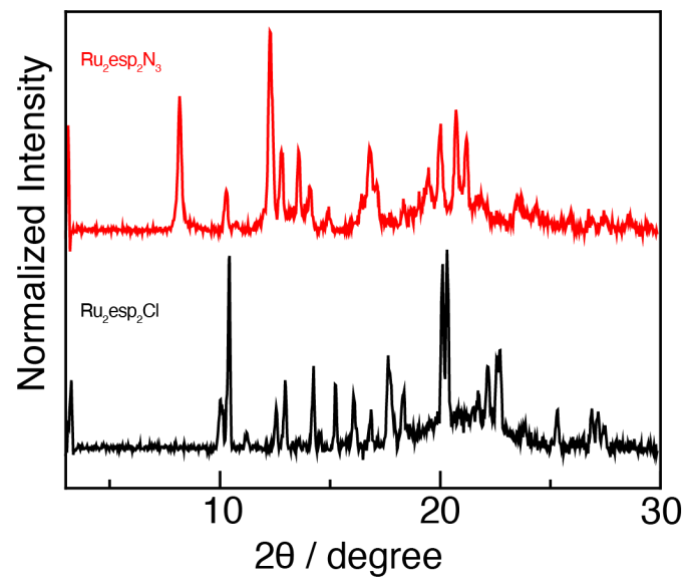

**Figure S3.** Powder XRD patterns of **3** (top) and Ru<sub>2</sub>esp<sub>2</sub>Cl (bottom).



#### D. X-ray experimental details of 3 (CCDC 2221722)

| Crystal data                                                                                                            |                                                                                                                                                                                                                                                                              |
|-------------------------------------------------------------------------------------------------------------------------|------------------------------------------------------------------------------------------------------------------------------------------------------------------------------------------------------------------------------------------------------------------------------|
| Chemical formula                                                                                                        | C <sub>64</sub> H <sub>80</sub> N <sub>6</sub> O <sub>16</sub> Ru <sub>4</sub>                                                                                                                                                                                               |
| <i>M</i> <sub>r</sub>                                                                                                   | 1593.62                                                                                                                                                                                                                                                                      |
| Crystal system, space group                                                                                             | triclinic, <i>P</i> 1                                                                                                                                                                                                                                                        |
| Temperature (K)                                                                                                         | 110                                                                                                                                                                                                                                                                          |
| <i>a</i> , <i>b</i> , <i>c</i> (Å)                                                                                      | 11.2116(9), 17.297(1), 19.843(1)                                                                                                                                                                                                                                             |
| $\alpha$ , $\beta$ , $\gamma$ (°)                                                                                       | 64.903(2), 89.935(2), 74.563(2)                                                                                                                                                                                                                                              |
| <i>V</i> (Å <sup>3</sup> )                                                                                              | 3331.4(5)                                                                                                                                                                                                                                                                    |
| <i>Z</i>                                                                                                                | 2                                                                                                                                                                                                                                                                            |
| Radiation type                                                                                                          | Mo K $\alpha$                                                                                                                                                                                                                                                                |
| $\mu$ (mm <sup>-1</sup> )                                                                                               | 0.96                                                                                                                                                                                                                                                                         |
| Crystal size (mm)                                                                                                       | 0.04 × 0.04 × 0.02                                                                                                                                                                                                                                                           |
| Data collection                                                                                                         |                                                                                                                                                                                                                                                                              |
| Diffractometer                                                                                                          | Bruker APEX-II CCD                                                                                                                                                                                                                                                           |
| Absorption correction                                                                                                   | Multi-scan<br><i>SADABS-2016/2</i> (Bruker,2016/2) was used for absorption correction. <i>wR</i> <sup>2</sup> (int) was 0.1207 before and 0.0825 after correction. The Ratio of minimum to maximum transmission is 0.8884. The $\lambda/2$ correction factor is not present. |
| <i>T</i> <sub>min</sub> , <i>T</i> <sub>max</sub>                                                                       | 0.6622, 0.7454                                                                                                                                                                                                                                                               |
| No. of measured, independent, and observed [ <i>I</i> > 2 <i>s</i> ( <i>I</i> )] reflections                            | 157822, 13694, 11184                                                                                                                                                                                                                                                         |
| <i>R</i> <sub>int</sub>                                                                                                 | 0.116                                                                                                                                                                                                                                                                        |
| ( <i>sin</i> $\theta$ / $\lambda$ ) <sub>max</sub> (Å <sup>-1</sup> )                                                   | 0.627                                                                                                                                                                                                                                                                        |
| Refinement                                                                                                              |                                                                                                                                                                                                                                                                              |
| <i>R</i> [ <i>F</i> <sup>2</sup> > 2 <i>s</i> ( <i>F</i> <sup>2</sup> )], <i>wR</i> ( <i>F</i> <sup>2</sup> ), <i>S</i> | 0.084, 0.185, 1.25                                                                                                                                                                                                                                                           |
| No. of reflections                                                                                                      | 13694                                                                                                                                                                                                                                                                        |
| No. of parameters                                                                                                       | 821                                                                                                                                                                                                                                                                          |
| H-atom treatment                                                                                                        | H-atom parameters constrained                                                                                                                                                                                                                                                |
| $\Delta\rho_{\text{max}}$ , $\Delta\rho_{\text{min}}$ (e Å <sup>-3</sup> )                                              | 1.81, -2.09                                                                                                                                                                                                                                                                  |

## E. Computational Data

Cartesian Coordinates (Å) of Optimized Stationary Points. The first column denotes the atomic number of the atom of interest. Lowest energy spin state for that stationary point is indicated.

### Quartet Azide Complex

|    |              |              |              |
|----|--------------|--------------|--------------|
| 44 | -0.033332000 | -0.000130000 | 0.975247000  |
| 44 | -0.132917000 | -0.000398000 | -1.344804000 |
| 8  | -0.035530000 | 2.048131000  | 0.893603000  |
| 8  | -0.139135000 | 2.021109000  | -1.348349000 |
| 7  | 0.218800000  | 0.000576000  | 3.010528000  |
| 8  | -2.077062000 | -0.004450000 | 1.022192000  |
| 8  | 2.003241000  | 0.004203000  | 0.802437000  |
| 8  | -0.026749000 | -2.048382000 | 0.893742000  |
| 8  | -2.146913000 | -0.004608000 | -1.220851000 |
| 8  | 1.886494000  | 0.003859000  | -1.437349000 |
| 8  | -0.130567000 | -2.021902000 | -1.348209000 |
| 6  | -0.085315000 | 2.641770000  | -0.224527000 |
| 6  | -2.720340000 | -0.005685000 | -0.069701000 |
| 6  | 2.553965000  | 0.005242000  | -0.338454000 |
| 6  | -0.074225000 | -2.642281000 | -0.224352000 |
| 6  | 4.035379000  | 0.008002000  | -0.405262000 |
| 6  | 4.785359000  | 0.009740000  | 0.784061000  |
| 6  | 4.687471000  | 0.008862000  | -1.649501000 |
| 6  | 6.178922000  | 0.012332000  | 0.722385000  |
| 6  | 6.081447000  | 0.011445000  | -1.702818000 |
| 6  | 6.827381000  | 0.013183000  | -0.518286000 |
| 1  | 4.266670000  | 0.009034000  | 1.744761000  |
| 1  | 4.091807000  | 0.007489000  | -2.563562000 |
| 1  | 6.762005000  | 0.013689000  | 1.646276000  |
| 1  | 6.589337000  | 0.012107000  | -2.670276000 |
| 1  | 7.919645000  | 0.015203000  | -0.562431000 |
| 6  | -0.080733000 | 4.126465000  | -0.242509000 |
| 6  | -0.017432000 | 4.840678000  | 0.965912000  |
| 6  | -0.138311000 | 4.818150000  | -1.463792000 |
| 6  | -0.011901000 | 6.235417000  | 0.949247000  |
| 6  | -0.132811000 | 6.213240000  | -1.473921000 |
| 6  | -0.069612000 | 6.922550000  | -0.268991000 |
| 1  | 0.027482000  | 4.290501000  | 1.907115000  |
| 1  | -0.186590000 | 4.251666000  | -2.394846000 |
| 1  | 0.038017000  | 6.789932000  | 1.889330000  |
| 1  | -0.177549000 | 6.750650000  | -2.424230000 |
| 1  | -0.064961000 | 8.015596000  | -0.279288000 |
| 6  | -4.203819000 | -0.008309000 | -0.024930000 |
| 6  | -4.947271000 | -0.009650000 | -1.216859000 |
| 6  | -4.865467000 | -0.009439000 | 1.214734000  |
| 6  | -6.341494000 | -0.012104000 | -1.166824000 |
| 6  | -6.259598000 | -0.011897000 | 1.258119000  |
| 6  | -6.998400000 | -0.013230000 | 0.069074000  |
| 1  | -4.421526000 | -0.008747000 | -2.172723000 |
| 1  | -4.275199000 | -0.008371000 | 2.132458000  |
| 1  | -6.919201000 | -0.013145000 | -2.094251000 |
| 1  | -6.773335000 | -0.012773000 | 2.222389000  |

|   |              |              |              |
|---|--------------|--------------|--------------|
| 1 | -8.090875000 | -0.015147000 | 0.105882000  |
| 6 | -0.064078000 | -4.126949000 | -0.242227000 |
| 6 | -0.119143000 | -4.818943000 | -1.463452000 |
| 6 | 0.001948000  | -4.840822000 | 0.966247000  |
| 6 | -0.108437000 | -6.214004000 | -1.473467000 |
| 6 | 0.012684000  | -6.235532000 | 0.949696000  |
| 6 | -0.042527000 | -6.922975000 | -0.268483000 |
| 1 | -0.169592000 | -4.252719000 | -2.394548000 |
| 1 | 0.044851000  | -4.290404000 | 1.907404000  |
| 1 | -0.151225000 | -6.751656000 | -2.423729000 |
| 1 | 0.064713000  | -6.789779000 | 1.889822000  |
| 1 | -0.033811000 | -8.015997000 | -0.278691000 |
| 7 | 1.300623000  | 0.003466000  | 3.537982000  |
| 7 | 2.309466000  | 0.006091000  | 4.075659000  |

#### Doublet Benzylic C-H Activation TS

|    |              |              |               |
|----|--------------|--------------|---------------|
| 44 | 0.390771000  | 0.016119000  | 0.902973000   |
| 44 | 0.830367000  | -0.047331000 | -1.469034000  |
| 8  | -0.650830000 | 1.763672000  | 0.532276000   |
| 8  | -0.252892000 | 1.669424000  | -1.683748000  |
| 7  | -0.167971000 | -0.150230000 | 2.570128000   |
| 8  | -1.306842000 | -1.096987000 | 0.379618000   |
| 8  | 2.102978000  | 1.121196000  | 1.100547000   |
| 8  | 1.517945000  | -1.727515000 | 1.007569000   |
| 8  | -0.825433000 | -1.152354000 | -1.821026000  |
| 8  | 2.504163000  | 1.059873000  | -1.111562000  |
| 8  | 1.910144000  | -1.743327000 | -1.2111725000 |
| 1  | -1.203397000 | 0.238894000  | 2.841795000   |
| 6  | -0.761181000 | 2.217439000  | -0.648591000  |
| 6  | -1.548587000 | -1.459493000 | -0.806901000  |
| 6  | 2.801655000  | 1.412429000  | 0.080947000   |
| 6  | 2.033255000  | -2.231648000 | -0.032325000  |
| 6  | -3.584441000 | 0.578458000  | 2.470688000   |
| 6  | -4.406521000 | -0.392326000 | 3.099977000   |
| 6  | -3.919427000 | 0.968380000  | 1.147465000   |
| 1  | -4.162269000 | -0.716187000 | 4.115559000   |
| 1  | -3.289764000 | 1.699082000  | 0.639230000   |
| 6  | -5.521691000 | -0.917136000 | 2.451526000   |
| 6  | -5.031687000 | 0.436906000  | 0.503929000   |
| 1  | -6.147275000 | -1.655436000 | 2.960509000   |
| 1  | -5.268680000 | 0.752136000  | -0.515327000  |
| 6  | -5.844300000 | -0.503901000 | 1.151932000   |
| 6  | 2.837168000  | -3.476636000 | 0.119423000   |
| 6  | 3.005520000  | -4.053698000 | 1.389047000   |
| 6  | 3.427073000  | -4.076305000 | -1.005149000  |
| 1  | 2.540514000  | -3.577138000 | 2.253458000   |
| 1  | 3.287461000  | -3.618050000 | -1.985219000  |
| 6  | 3.758101000  | -5.220003000 | 1.529618000   |
| 6  | 4.178821000  | -5.242880000 | -0.858975000  |
| 1  | 3.887892000  | -5.667639000 | 2.517979000   |
| 1  | 4.636930000  | -5.708281000 | -1.735150000  |
| 6  | 4.345214000  | -5.815559000 | 0.407083000   |
| 1  | 4.934351000  | -6.729540000 | 0.519517000   |
| 6  | 4.038493000  | 2.212939000  | 0.288577000   |
| 6  | 4.837207000  | 2.568692000  | -0.810589000  |

|   |              |              |              |
|---|--------------|--------------|--------------|
| 6 | 4.410223000  | 2.613523000  | 1.582745000  |
| 1 | 4.537104000  | 2.249998000  | -1.809808000 |
| 1 | 3.781540000  | 2.329041000  | 2.427902000  |
| 6 | 5.996819000  | 3.319633000  | -0.614812000 |
| 6 | 5.570917000  | 3.363719000  | 1.772819000  |
| 1 | 6.617118000  | 3.595733000  | -1.470972000 |
| 1 | 5.859186000  | 3.673916000  | 2.780118000  |
| 6 | 6.364735000  | 3.717629000  | 0.675497000  |
| 1 | 7.273889000  | 4.305452000  | 0.826780000  |
| 6 | -1.546264000 | 3.469391000  | -0.841906000 |
| 6 | -1.838063000 | 3.918668000  | -2.140316000 |
| 6 | -2.005107000 | 4.199533000  | 0.267111000  |
| 1 | -1.473910000 | 3.344520000  | -2.993408000 |
| 1 | -1.766569000 | 3.848989000  | 1.271547000  |
| 6 | -2.588133000 | 5.080846000  | -2.324461000 |
| 6 | -2.751647000 | 5.362785000  | 0.078463000  |
| 1 | -2.817342000 | 5.425283000  | -3.335791000 |
| 1 | -3.105270000 | 5.928146000  | 0.943925000  |
| 6 | -3.045896000 | 5.803532000  | -1.216861000 |
| 1 | -3.633044000 | 6.713798000  | -1.363379000 |
| 6 | -2.746949000 | -2.309555000 | -1.045372000 |
| 6 | -3.559415000 | -2.692644000 | 0.032753000  |
| 6 | -3.061663000 | -2.736235000 | -2.346560000 |
| 1 | -3.317713000 | -2.338483000 | 1.035193000  |
| 1 | -2.421595000 | -2.429647000 | -3.175055000 |
| 6 | -4.673447000 | -3.502150000 | -0.189607000 |
| 6 | -4.179131000 | -3.542579000 | -2.563587000 |
| 1 | -5.306415000 | -3.792325000 | 0.652095000  |
| 1 | -4.423216000 | -3.873927000 | -3.575914000 |
| 6 | -4.984512000 | -3.928648000 | -1.485101000 |
| 1 | -5.858537000 | -4.562616000 | -1.656683000 |
| 1 | -6.713742000 | -0.923281000 | 0.640737000  |
| 6 | -2.446662000 | 1.142000000  | 3.147129000  |
| 1 | -2.001185000 | 2.055200000  | 2.748730000  |
| 1 | -2.357058000 | 0.994834000  | 4.228147000  |

#### Singlet Dinitrogen

|   |             |             |              |
|---|-------------|-------------|--------------|
| 7 | 0.000000000 | 0.000000000 | 0.545451000  |
| 7 | 0.000000000 | 0.000000000 | -0.545451000 |

#### Singlet Toluene

|   |              |              |              |
|---|--------------|--------------|--------------|
| 1 | -0.011998000 | 0.737828000  | 2.154672000  |
| 6 | 0.030406000  | 2.426491000  | 0.000000000  |
| 1 | -0.463211000 | 2.844002000  | 0.891258000  |
| 1 | -0.463211000 | 2.844002000  | -0.891258000 |
| 1 | 1.070949000  | 2.796393000  | 0.000000000  |
| 6 | -0.005411000 | 0.917155000  | 0.000000000  |
| 6 | -0.008011000 | 0.195285000  | -1.204492000 |
| 6 | -0.008011000 | -1.202532000 | -1.207281000 |
| 6 | -0.007284000 | -1.907884000 | 0.000000000  |
| 6 | -0.008011000 | -1.202532000 | 1.207281000  |
| 6 | -0.008011000 | 0.195285000  | 1.204492000  |
| 1 | -0.011998000 | 0.737828000  | -2.154672000 |
| 1 | -0.012177000 | -1.743384000 | -2.157501000 |
| 1 | -0.010175000 | -3.000901000 | 0.000000000  |

1 -0.012177000 -1.743384000 2.157501000

**Doublet Ru<sub>2</sub>N Intermediate**

44 0.031944000 0.000046000 1.246095000  
44 -0.046520000 -0.000164000 -1.197119000  
8 0.066898000 -2.063458000 1.059616000  
8 -0.036008000 -2.035200000 -1.191206000  
7 -0.239329000 -0.000639000 2.874538000  
8 2.068961000 0.002716000 1.088320000  
8 -2.079266000 -0.002591000 1.043777000  
8 0.061572000 2.063543000 1.059637000  
8 2.004071000 0.002719000 -1.162451000  
8 -2.070158000 -0.003009000 -1.212840000  
8 -0.041737000 2.034938000 -1.191159000  
6 0.021180000 -2.642745000 -0.069962000  
6 2.632992000 0.003503000 -0.055057000  
6 -2.664033000 -0.003567000 -0.078663000  
6 0.014076000 2.642691000 -0.069961000  
6 -4.154764000 -0.005320000 -0.082025000  
6 -4.862644000 -0.005980000 1.131300000  
6 -4.854177000 -0.006360000 -1.299982000  
6 -6.257772000 -0.007678000 1.123524000  
6 -6.249612000 -0.008059000 -1.302015000  
6 -6.952368000 -0.008715000 -0.091753000  
1 -4.306339000 -0.005189000 2.069847000  
1 -4.291789000 -0.005858000 -2.234718000  
1 -6.806852000 -0.008210000 2.068268000  
1 -6.792235000 -0.008887000 -2.250523000  
1 -8.045549000 -0.010048000 -0.095489000  
6 0.038777000 -4.131438000 -0.081350000  
6 0.099140000 -4.847491000 1.125779000  
6 -0.005948000 -4.822176000 -1.303573000  
6 0.114965000 -6.242331000 1.107545000  
6 0.010239000 -6.217288000 -1.315887000  
6 0.070721000 -6.928219000 -0.111871000  
1 0.132526000 -4.299008000 2.068278000  
1 -0.053659000 -4.253253000 -2.233142000  
1 0.161616000 -6.797978000 2.047225000  
1 -0.024779000 -6.753323000 -2.267423000  
1 0.083066000 -8.021236000 -0.123693000  
6 4.120399000 0.005445000 -0.086177000  
6 4.792845000 0.006359000 -1.319467000  
6 4.854333000 0.006403000 1.111756000  
6 6.187627000 0.008220000 -1.351802000  
6 6.248810000 0.008264000 1.073383000  
6 6.916411000 0.009171000 -0.156933000  
1 4.209991000 0.005620000 -2.241608000  
1 4.320528000 0.005706000 2.063220000  
1 6.709470000 0.008943000 -2.311797000  
1 6.818472000 0.009023000 2.005773000  
1 8.009191000 0.010632000 -0.184456000  
6 0.027982000 4.131420000 -0.081380000  
6 -0.018731000 4.822031000 -1.303603000  
6 0.086767000 4.847639000 1.125729000  
6 -0.006101000 6.217180000 -1.315933000

|   |              |             |              |
|---|--------------|-------------|--------------|
| 6 | 0.099037000  | 6.242514000 | 1.107479000  |
| 6 | 0.052816000  | 6.928274000 | -0.111935000 |
| 1 | -0.065236000 | 4.252981000 | -2.233154000 |
| 1 | 0.121672000  | 4.299256000 | 2.068231000  |
| 1 | -0.042698000 | 6.753116000 | -2.267464000 |
| 1 | 0.144432000  | 6.798288000 | 2.047145000  |
| 1 | 0.062373000  | 8.021319000 | -0.123769000 |

**Quartet Imido + Benzyl Radical Pair**

|    |              |              |              |
|----|--------------|--------------|--------------|
| 44 | -0.022477000 | 0.000739000  | 1.201525000  |
| 44 | 0.016187000  | -0.000803000 | -1.205167000 |
| 8  | 2.058699000  | -0.072842000 | 1.063249000  |
| 8  | 2.048534000  | -0.073046000 | -1.192171000 |
| 7  | 0.209932000  | -0.008192000 | 2.994161000  |
| 8  | 0.043354000  | 2.059315000  | 1.023777000  |
| 8  | -0.101671000 | -2.057574000 | 1.023638000  |
| 8  | -2.071753000 | 0.072978000  | 1.120457000  |
| 8  | 0.077633000  | 2.024708000  | -1.223761000 |
| 8  | -0.066656000 | -2.025391000 | -1.223970000 |
| 8  | -2.013690000 | 0.071635000  | -1.131690000 |
| 6  | 2.646443000  | -0.093848000 | -0.058595000 |
| 6  | 0.079085000  | 2.640551000  | -0.100287000 |
| 6  | -0.108501000 | -2.639807000 | -0.100437000 |
| 6  | -2.640686000 | 0.093611000  | -0.012492000 |
| 6  | -0.168607000 | -4.126390000 | -0.119842000 |
| 6  | -0.236538000 | -4.843711000 | 1.086115000  |
| 6  | -0.158159000 | -4.814771000 | -1.344059000 |
| 6  | -0.292826000 | -6.237420000 | 1.064775000  |
| 6  | -0.214021000 | -6.208937000 | -1.359528000 |
| 6  | -0.281338000 | -6.921139000 | -0.156677000 |
| 1  | -0.245819000 | -4.296079000 | 2.029783000  |
| 1  | -0.105758000 | -4.245267000 | -2.273020000 |
| 1  | -0.346389000 | -6.793989000 | 2.003561000  |
| 1  | -0.205285000 | -6.743200000 | -2.312682000 |
| 1  | -0.325416000 | -8.013307000 | -0.170983000 |
| 6  | 4.135974000  | -0.145860000 | -0.069148000 |
| 6  | 4.850433000  | -0.170265000 | 1.139901000  |
| 6  | 4.830219000  | -0.170734000 | -1.289865000 |
| 6  | 6.244571000  | -0.218929000 | 1.126304000  |
| 6  | 6.224801000  | -0.219446000 | -1.298629000 |
| 6  | 6.933254000  | -0.243546000 | -0.092063000 |
| 1  | 4.300486000  | -0.150744000 | 2.081777000  |
| 1  | 4.264200000  | -0.151529000 | -2.222152000 |
| 1  | 6.797638000  | -0.237804000 | 2.068541000  |
| 1  | 6.762299000  | -0.238726000 | -2.249833000 |
| 1  | 8.025694000  | -0.281647000 | -0.100903000 |
| 6  | 0.123828000  | 4.127658000  | -0.119671000 |
| 6  | 0.183638000  | 4.813466000  | -1.343889000 |
| 6  | 0.105790000  | 4.848099000  | 1.086234000  |
| 6  | 0.226026000  | 6.208094000  | -1.359439000 |
| 6  | 0.147656000  | 6.242314000  | 1.064813000  |
| 6  | 0.208030000  | 6.923401000  | -0.156668000 |
| 1  | 0.196702000  | 4.241583000  | -2.272782000 |
| 1  | 0.057548000  | 4.302550000  | 2.029922000  |
| 1  | 0.273096000  | 6.740328000  | -2.312605000 |

|   |              |              |              |
|---|--------------|--------------|--------------|
| 1 | 0.132776000  | 6.801355000  | 2.003541000  |
| 1 | 0.240844000  | 8.015963000  | -0.171061000 |
| 6 | -4.127164000 | 0.146141000  | -0.049700000 |
| 6 | -4.801618000 | 0.170856000  | -1.281462000 |
| 6 | -4.858552000 | 0.171136000  | 1.149535000  |
| 6 | -6.195798000 | 0.220039000  | -1.311263000 |
| 6 | -6.252241000 | 0.220195000  | 1.113799000  |
| 6 | -6.922019000 | 0.244673000  | -0.115159000 |
| 1 | -4.221513000 | 0.151178000  | -2.205089000 |
| 1 | -4.321429000 | 0.151646000  | 2.099115000  |
| 1 | -6.719132000 | 0.239254000  | -2.270323000 |
| 1 | -6.819694000 | 0.239510000  | 2.047394000  |
| 1 | -8.014208000 | 0.283132000  | -0.140643000 |
| 1 | 1.194916000  | -0.044881000 | 3.307668000  |

#### Doublet Benzyl Radical

|   |              |              |              |
|---|--------------|--------------|--------------|
| 1 | -0.000008000 | 0.795989000  | 2.169216000  |
| 6 | 0.000203000  | 2.406832000  | 0.000000000  |
| 1 | 0.000243000  | 2.969050000  | 0.936579000  |
| 1 | 0.000243000  | 2.969050000  | -0.936579000 |
| 6 | -0.000122000 | 0.997768000  | 0.000000000  |
| 6 | -0.000034000 | 0.252560000  | -1.220234000 |
| 6 | -0.000034000 | -1.135804000 | -1.213847000 |
| 6 | -0.000027000 | -1.843112000 | 0.000000000  |
| 6 | -0.000034000 | -1.135804000 | 1.213847000  |
| 6 | -0.000034000 | 0.252560000  | 1.220234000  |
| 1 | -0.000008000 | 0.795989000  | -2.169216000 |
| 1 | -0.000016000 | -1.682160000 | -2.160899000 |
| 1 | 0.000061000  | -2.935759000 | 0.000000000  |
| 1 | -0.000016000 | -1.682160000 | 2.160899000  |

#### Doublet Ru<sub>2</sub>-N(H)benzyl Intermediate

|    |              |              |              |
|----|--------------|--------------|--------------|
| 44 | -0.324466000 | -0.025592000 | 0.706318000  |
| 44 | -0.873948000 | 0.045417000  | -1.548837000 |
| 8  | 0.451929000  | 1.904662000  | 0.466527000  |
| 8  | -0.063394000 | 1.925138000  | -1.716554000 |
| 8  | -2.145849000 | 0.828738000  | 1.161507000  |
| 8  | 1.471768000  | -0.904664000 | 0.122180000  |
| 8  | -1.122175000 | -1.918163000 | 0.830798000  |
| 8  | -2.677493000 | 0.867784000  | -1.016215000 |
| 8  | 0.943320000  | -0.763963000 | -2.051645000 |
| 8  | -1.658278000 | -1.840238000 | -1.344755000 |
| 6  | 0.448164000  | 2.454109000  | -0.679207000 |
| 6  | -2.939796000 | 1.104347000  | 0.206894000  |
| 6  | 1.745662000  | -1.060053000 | -1.107062000 |
| 6  | -1.611131000 | -2.438490000 | -0.222584000 |
| 6  | 3.085993000  | -1.608976000 | -1.456046000 |
| 6  | 4.041824000  | -1.819040000 | -0.448066000 |
| 6  | 3.403385000  | -1.901228000 | -2.792259000 |
| 6  | 5.303188000  | -2.316156000 | -0.777966000 |
| 6  | 4.664261000  | -2.404150000 | -3.115657000 |
| 6  | 5.615638000  | -2.611331000 | -2.109633000 |
| 1  | 3.794060000  | -1.577513000 | 0.585101000  |
| 1  | 2.652896000  | -1.728983000 | -3.565365000 |
| 1  | 6.044647000  | -2.468230000 | 0.010030000  |

|   |              |              |              |
|---|--------------|--------------|--------------|
| 1 | 4.908291000  | -2.633811000 | -4.155873000 |
| 1 | 6.604141000  | -3.001937000 | -2.365753000 |
| 6 | 1.093240000  | 3.791773000  | -0.814079000 |
| 6 | 1.718830000  | 4.387981000  | 0.293075000  |
| 6 | 1.091136000  | 4.453304000  | -2.052336000 |
| 6 | 2.336170000  | 5.632522000  | 0.160982000  |
| 6 | 1.707600000  | 5.698832000  | -2.179799000 |
| 6 | 2.330889000  | 6.289630000  | -1.074713000 |
| 1 | 1.715735000  | 3.864751000  | 1.250340000  |
| 1 | 0.604277000  | 3.978262000  | -2.905314000 |
| 1 | 2.823159000  | 6.092720000  | 1.024264000  |
| 1 | 1.703717000  | 6.211445000  | -3.144887000 |
| 1 | 2.814431000  | 7.264676000  | -1.176905000 |
| 6 | -4.249045000 | 1.733033000  | 0.538786000  |
| 6 | -5.147506000 | 2.071409000  | -0.485869000 |
| 6 | -4.588236000 | 1.989982000  | 1.876974000  |
| 6 | -6.372550000 | 2.661947000  | -0.173227000 |
| 6 | -5.814689000 | 2.580073000  | 2.185103000  |
| 6 | -6.707738000 | 2.916924000  | 1.161481000  |
| 1 | -4.871999000 | 1.866301000  | -1.521373000 |
| 1 | -3.881505000 | 1.720660000  | 2.663297000  |
| 1 | -7.069632000 | 2.924800000  | -0.972727000 |
| 1 | -6.076553000 | 2.778409000  | 3.227365000  |
| 1 | -7.667968000 | 3.379399000  | 1.404616000  |
| 6 | -2.162034000 | -3.819471000 | -0.133380000 |
| 6 | -2.692429000 | -4.441069000 | -1.275224000 |
| 6 | -2.151340000 | -4.504354000 | 1.092491000  |
| 6 | -3.205959000 | -5.735774000 | -1.190044000 |
| 6 | -2.666655000 | -5.798619000 | 1.173244000  |
| 6 | -3.193953000 | -6.415836000 | 0.033136000  |
| 1 | -2.694682000 | -3.898004000 | -2.221446000 |
| 1 | -1.737775000 | -4.008960000 | 1.972179000  |
| 1 | -3.617497000 | -6.217520000 | -2.080398000 |
| 1 | -2.657986000 | -6.329202000 | 2.128555000  |
| 1 | -3.596940000 | -7.429937000 | 0.098109000  |
| 7 | 0.443994000  | 0.059559000  | 2.490373000  |
| 1 | 0.463920000  | 0.975373000  | 2.936018000  |
| 1 | 1.309519000  | -1.818768000 | 2.536787000  |
| 6 | 1.431458000  | -0.842008000 | 3.030470000  |
| 1 | 1.227595000  | -1.003296000 | 4.108006000  |
| 6 | 2.880221000  | -0.393909000 | 2.870328000  |
| 6 | 3.235457000  | 0.726551000  | 2.106967000  |
| 1 | 2.461325000  | 1.314509000  | 1.613392000  |
| 6 | 4.580545000  | 1.070391000  | 1.936066000  |
| 1 | 4.838653000  | 1.941077000  | 1.327512000  |
| 6 | 5.588720000  | 0.298735000  | 2.519605000  |
| 1 | 6.639293000  | 0.564448000  | 2.377465000  |
| 6 | 5.241966000  | -0.820497000 | 3.285205000  |
| 6 | 3.897939000  | -1.159470000 | 3.460768000  |
| 1 | 3.633632000  | -2.038935000 | 4.056334000  |
| 1 | 6.021518000  | -1.431965000 | 3.747612000  |

**Doublet Arene CH Activation TS**

|    |             |              |              |
|----|-------------|--------------|--------------|
| 44 | 0.244940000 | 0.064531000  | 0.745980000  |
| 44 | 0.920016000 | -0.014511000 | -1.572742000 |



|   |              |              |              |
|---|--------------|--------------|--------------|
| 8 | 2.201094000  | -0.554454000 | 1.190228000  |
| 8 | 2.796126000  | -0.531745000 | -0.979818000 |
| 8 | 0.852212000  | 2.021283000  | 0.757621000  |
| 8 | -0.330518000 | -1.924691000 | 0.405569000  |
| 8 | -1.611786000 | 0.684387000  | 0.121893000  |
| 8 | 1.465995000  | 1.948516000  | -1.401952000 |
| 8 | 0.377039000  | -1.972322000 | -1.729143000 |
| 8 | -0.987035000 | 0.592610000  | -2.035397000 |
| 6 | 3.036428000  | -0.739985000 | 0.258836000  |
| 6 | 1.326561000  | 2.559716000  | -0.292300000 |
| 6 | -0.152624000 | -2.513167000 | -0.702260000 |
| 6 | -1.850699000 | 0.795637000  | -1.119644000 |
| 6 | -0.597722000 | -3.932485000 | -0.813599000 |
| 6 | -1.083791000 | -4.611445000 | 0.315912000  |
| 6 | -0.535647000 | -4.594284000 | -2.050353000 |
| 6 | -1.506956000 | -5.936729000 | 0.206831000  |
| 6 | -0.962326000 | -5.918863000 | -2.155730000 |
| 6 | -1.448548000 | -6.591377000 | -1.028785000 |
| 1 | -1.115023000 | -4.092692000 | 1.275184000  |
| 1 | -0.152861000 | -4.057245000 | -2.919405000 |
| 1 | -1.881039000 | -6.462746000 | 1.088588000  |
| 1 | -0.915145000 | -6.430232000 | -3.120325000 |
| 1 | -1.780817000 | -7.629362000 | -1.113194000 |
| 6 | 4.401881000  | -1.216560000 | 0.626178000  |
| 6 | 4.722932000  | -1.455853000 | 1.972205000  |
| 6 | 5.368225000  | -1.429634000 | -0.369934000 |
| 6 | 5.998949000  | -1.904039000 | 2.316034000  |
| 6 | 6.643060000  | -1.878178000 | -0.021429000 |
| 6 | 6.960100000  | -2.115723000 | 1.320810000  |
| 1 | 3.961511000  | -1.285752000 | 2.734955000  |
| 1 | 5.106347000  | -1.238858000 | -1.411660000 |
| 1 | 6.246256000  | -2.089401000 | 3.364270000  |
| 1 | 7.393277000  | -2.043055000 | -0.798819000 |
| 1 | 7.959270000  | -2.466755000 | 1.592119000  |
| 6 | 1.740665000  | 3.988025000  | -0.216409000 |
| 6 | 2.262400000  | 4.629884000  | -1.351100000 |
| 6 | 1.610575000  | 4.696455000  | 0.989234000  |
| 6 | 2.648970000  | 5.968748000  | -1.278848000 |
| 6 | 1.999277000  | 6.034835000  | 1.056676000  |
| 6 | 2.518181000  | 6.672424000  | -0.076141000 |
| 1 | 2.359062000  | 4.067257000  | -2.280782000 |
| 1 | 1.204779000  | 4.184855000  | 1.863294000  |
| 1 | 3.054602000  | 6.466371000  | -2.163154000 |
| 1 | 1.898062000  | 6.584039000  | 1.995986000  |
| 1 | 2.822145000  | 7.721069000  | -0.021298000 |
| 6 | -3.227310000 | 1.203051000  | -1.519127000 |
| 6 | -3.582285000 | 1.268499000  | -2.875576000 |
| 6 | -4.174960000 | 1.520027000  | -0.531714000 |
| 6 | -4.876779000 | 1.642365000  | -3.240414000 |
| 6 | -5.466192000 | 1.898077000  | -0.902101000 |
| 6 | -5.819727000 | 1.957660000  | -2.255289000 |
| 1 | -2.834727000 | 1.022945000  | -3.631508000 |
| 1 | -3.886782000 | 1.464521000  | 0.518038000  |
| 1 | -5.152017000 | 1.690247000  | -4.296898000 |
| 1 | -6.199268000 | 2.150546000  | -0.131846000 |

|   |              |              |              |
|---|--------------|--------------|--------------|
| 1 | -6.832099000 | 2.253034000  | -2.543339000 |
| 1 | -0.870828000 | -0.839859000 | 3.148403000  |
| 6 | -2.068642000 | -0.382410000 | 2.843887000  |
| 6 | -2.567809000 | 0.688350000  | 3.575845000  |
| 1 | -1.890765000 | 1.331310000  | 4.143236000  |
| 6 | -3.946638000 | 0.927874000  | 3.551620000  |
| 1 | -4.356283000 | 1.769298000  | 4.117838000  |
| 6 | -4.809922000 | 0.112382000  | 2.801242000  |
| 6 | -4.259623000 | -0.954835000 | 2.067147000  |
| 6 | -2.886873000 | -1.202624000 | 2.068198000  |
| 1 | -2.454170000 | -2.000348000 | 1.464709000  |
| 1 | -4.917527000 | -1.588091000 | 1.464762000  |
| 7 | -0.108549000 | -0.201849000 | 2.512785000  |
| 6 | -6.295734000 | 0.369846000  | 2.759992000  |
| 1 | -6.661108000 | 0.404149000  | 1.720499000  |
| 1 | -6.852049000 | -0.435501000 | 3.269304000  |
| 1 | -6.560445000 | 1.319665000  | 3.247721000  |

### Triplet Ru<sub>2</sub> Imido Intermediate

|    |              |              |              |
|----|--------------|--------------|--------------|
| 44 | -0.022477000 | 0.000739000  | 1.201525000  |
| 44 | 0.016187000  | -0.000803000 | -1.205167000 |
| 8  | 2.058699000  | -0.072842000 | 1.063249000  |
| 8  | 2.048534000  | -0.073046000 | -1.192171000 |
| 7  | 0.209932000  | -0.008192000 | 2.994161000  |
| 8  | 0.043354000  | 2.059315000  | 1.023777000  |
| 8  | -0.101671000 | -2.057574000 | 1.023638000  |
| 8  | -2.071753000 | 0.072978000  | 1.120457000  |
| 8  | 0.077633000  | 2.024708000  | -1.223761000 |
| 8  | -0.066656000 | -2.025391000 | -1.223970000 |
| 8  | -2.013690000 | 0.071635000  | -1.131690000 |
| 6  | 2.646443000  | -0.093848000 | -0.058595000 |
| 6  | 0.079085000  | 2.640551000  | -0.100287000 |
| 6  | -0.108501000 | -2.639807000 | -0.100437000 |
| 6  | -2.640686000 | 0.093611000  | -0.012492000 |
| 6  | -0.168607000 | -4.126390000 | -0.119842000 |
| 6  | -0.236538000 | -4.843711000 | 1.086115000  |
| 6  | -0.158159000 | -4.814771000 | -1.344059000 |
| 6  | -0.292826000 | -6.237420000 | 1.064775000  |
| 6  | -0.214021000 | -6.208937000 | -1.359528000 |
| 6  | -0.281338000 | -6.921139000 | -0.156677000 |
| 1  | -0.245819000 | -4.296079000 | 2.029783000  |
| 1  | -0.105758000 | -4.245267000 | -2.273020000 |
| 1  | -0.346389000 | -6.793989000 | 2.003561000  |
| 1  | -0.205285000 | -6.743200000 | -2.312682000 |
| 1  | -0.325416000 | -8.013307000 | -0.170983000 |
| 6  | 4.135974000  | -0.145860000 | -0.069148000 |
| 6  | 4.850433000  | -0.170265000 | 1.139901000  |
| 6  | 4.830219000  | -0.170734000 | -1.289865000 |
| 6  | 6.244571000  | -0.218929000 | 1.126304000  |
| 6  | 6.224801000  | -0.219446000 | -1.298629000 |
| 6  | 6.933254000  | -0.243546000 | -0.092063000 |
| 1  | 4.300486000  | -0.150744000 | 2.081777000  |
| 1  | 4.264200000  | -0.151529000 | -2.222152000 |
| 1  | 6.797638000  | -0.237804000 | 2.068541000  |
| 1  | 6.762299000  | -0.238726000 | -2.249833000 |

|   |              |              |              |
|---|--------------|--------------|--------------|
| 1 | 8.025694000  | -0.281647000 | -0.100903000 |
| 6 | 0.123828000  | 4.127658000  | -0.119671000 |
| 6 | 0.183638000  | 4.813466000  | -1.343889000 |
| 6 | 0.105790000  | 4.848099000  | 1.086234000  |
| 6 | 0.226026000  | 6.208094000  | -1.359439000 |
| 6 | 0.147656000  | 6.242314000  | 1.064813000  |
| 6 | 0.208030000  | 6.923401000  | -0.156668000 |
| 1 | 0.196702000  | 4.241583000  | -2.272782000 |
| 1 | 0.057548000  | 4.302550000  | 2.029922000  |
| 1 | 0.273096000  | 6.740328000  | -2.312605000 |
| 1 | 0.132776000  | 6.801355000  | 2.003541000  |
| 1 | 0.240844000  | 8.015963000  | -0.171061000 |
| 6 | -4.127164000 | 0.146141000  | -0.049700000 |
| 6 | -4.801618000 | 0.170856000  | -1.281462000 |
| 6 | -4.858552000 | 0.171136000  | 1.149535000  |
| 6 | -6.195798000 | 0.220039000  | -1.311263000 |
| 6 | -6.252241000 | 0.220195000  | 1.113799000  |
| 6 | -6.922019000 | 0.244673000  | -0.115159000 |
| 1 | -4.221513000 | 0.151178000  | -2.205089000 |
| 1 | -4.321429000 | 0.151646000  | 2.099115000  |
| 1 | -6.719132000 | 0.239254000  | -2.270323000 |
| 1 | -6.819694000 | 0.239510000  | 2.047394000  |
| 1 | -8.014208000 | 0.283132000  | -0.140643000 |
| 1 | 1.194916000  | -0.044881000 | 3.307668000  |

**Doublet Ru<sub>2</sub>NH + Aryl Radical Pair**

|   |              |              |              |
|---|--------------|--------------|--------------|
| 1 | -0.012414000 | 0.675754000  | 2.158645000  |
| 6 | 0.030006000  | 2.356573000  | 0.000000000  |
| 1 | -0.464513000 | 2.773768000  | 0.890728000  |
| 1 | -0.464513000 | 2.773768000  | -0.890728000 |
| 1 | 1.069989000  | 2.727656000  | 0.000000000  |
| 6 | -0.005604000 | 0.846276000  | 0.000000000  |
| 6 | -0.008169000 | 0.130259000  | -1.209415000 |
| 6 | -0.008169000 | -1.275249000 | -1.225007000 |
| 6 | -0.006791000 | -1.909537000 | 0.000000000  |
| 6 | -0.008169000 | -1.275249000 | 1.225007000  |
| 6 | -0.008169000 | 0.130259000  | 1.209415000  |
| 1 | -0.012414000 | 0.675754000  | -2.158645000 |
| 1 | -0.012879000 | -1.823346000 | -2.171584000 |
| 1 | -0.012879000 | -1.823346000 | 2.171584000  |

**Doublet Ru<sub>2</sub>-N(H)aryl Intermediate**

|    |              |              |              |
|----|--------------|--------------|--------------|
| 44 | -0.324466000 | -0.025592000 | 0.706318000  |
| 44 | -0.873948000 | 0.045417000  | -1.548837000 |
| 8  | 0.451929000  | 1.904662000  | 0.466527000  |
| 8  | -0.063394000 | 1.925138000  | -1.716554000 |
| 8  | -2.145849000 | 0.828738000  | 1.161507000  |
| 8  | 1.471768000  | -0.904664000 | 0.122180000  |
| 8  | -1.122175000 | -1.918163000 | 0.830798000  |
| 8  | -2.677493000 | 0.867784000  | -1.016215000 |
| 8  | 0.943320000  | -0.763963000 | -2.051645000 |
| 8  | -1.658278000 | -1.840238000 | -1.344755000 |
| 6  | 0.448164000  | 2.454109000  | -0.679207000 |
| 6  | -2.939796000 | 1.104347000  | 0.206894000  |
| 6  | 1.745662000  | -1.060053000 | -1.107062000 |

|   |              |              |              |
|---|--------------|--------------|--------------|
| 6 | -1.611131000 | -2.438490000 | -0.222584000 |
| 6 | 3.085993000  | -1.608976000 | -1.456046000 |
| 6 | 4.041824000  | -1.819040000 | -0.448066000 |
| 6 | 3.403385000  | -1.901228000 | -2.792259000 |
| 6 | 5.303188000  | -2.316156000 | -0.777966000 |
| 6 | 4.664261000  | -2.404150000 | -3.115657000 |
| 6 | 5.615638000  | -2.611331000 | -2.109633000 |
| 1 | 3.794060000  | -1.577513000 | 0.585101000  |
| 1 | 2.652896000  | -1.728983000 | -3.565365000 |
| 1 | 6.044647000  | -2.468230000 | 0.010030000  |
| 1 | 4.908291000  | -2.633811000 | -4.155873000 |
| 1 | 6.604141000  | -3.001937000 | -2.365753000 |
| 6 | 1.093240000  | 3.791773000  | -0.814079000 |
| 6 | 1.718830000  | 4.387981000  | 0.293075000  |
| 6 | 1.091136000  | 4.453304000  | -2.052336000 |
| 6 | 2.336170000  | 5.632522000  | 0.160982000  |
| 6 | 1.707600000  | 5.698832000  | -2.179799000 |
| 6 | 2.330889000  | 6.289630000  | -1.074713000 |
| 1 | 1.715735000  | 3.864751000  | 1.250340000  |
| 1 | 0.604277000  | 3.978262000  | -2.905314000 |
| 1 | 2.823159000  | 6.092720000  | 1.024264000  |
| 1 | 1.703717000  | 6.211445000  | -3.144887000 |
| 1 | 2.814431000  | 7.264676000  | -1.176905000 |
| 6 | -4.249045000 | 1.733033000  | 0.538786000  |
| 6 | -5.147506000 | 2.071409000  | -0.485869000 |
| 6 | -4.588236000 | 1.989982000  | 1.876974000  |
| 6 | -6.372550000 | 2.661947000  | -0.173227000 |
| 6 | -5.814689000 | 2.580073000  | 2.185103000  |
| 6 | -6.707738000 | 2.916924000  | 1.161481000  |
| 1 | -4.871999000 | 1.866301000  | -1.521373000 |
| 1 | -3.881505000 | 1.720660000  | 2.663297000  |
| 1 | -7.069632000 | 2.924800000  | -0.972727000 |
| 1 | -6.076553000 | 2.778409000  | 3.227365000  |
| 1 | -7.667968000 | 3.379399000  | 1.404616000  |
| 6 | -2.162034000 | -3.819471000 | -0.133380000 |
| 6 | -2.692429000 | -4.441069000 | -1.275224000 |
| 6 | -2.151340000 | -4.504354000 | 1.092491000  |
| 6 | -3.205959000 | -5.735774000 | -1.190044000 |
| 6 | -2.666655000 | -5.798619000 | 1.173244000  |
| 6 | -3.193953000 | -6.415836000 | 0.033136000  |
| 1 | -2.694682000 | -3.898004000 | -2.221446000 |
| 1 | -1.737775000 | -4.008960000 | 1.972179000  |
| 1 | -3.617497000 | -6.217520000 | -2.080398000 |
| 1 | -2.657986000 | -6.329202000 | 2.128555000  |
| 1 | -3.596940000 | -7.429937000 | 0.098109000  |
| 7 | 0.443994000  | 0.059559000  | 2.490373000  |
| 1 | 0.463920000  | 0.975373000  | 2.936018000  |
| 1 | 1.309519000  | -1.818768000 | 2.536787000  |
| 6 | 1.431458000  | -0.842008000 | 3.030470000  |
| 1 | 1.227595000  | -1.003296000 | 4.108006000  |
| 6 | 2.880221000  | -0.393909000 | 2.870328000  |
| 6 | 3.235457000  | 0.726551000  | 2.106967000  |
| 1 | 2.461325000  | 1.314509000  | 1.613392000  |
| 6 | 4.580545000  | 1.070391000  | 1.936066000  |
| 1 | 4.838653000  | 1.941077000  | 1.327512000  |

|   |             |              |             |
|---|-------------|--------------|-------------|
| 6 | 5.588720000 | 0.298735000  | 2.519605000 |
| 1 | 6.639293000 | 0.564448000  | 2.377465000 |
| 6 | 5.241966000 | -0.820497000 | 3.285205000 |
| 6 | 3.897939000 | -1.159470000 | 3.460768000 |
| 1 | 3.633632000 | -2.038935000 | 4.056334000 |
| 1 | 6.021518000 | -1.431965000 | 3.747612000 |

**Doublet TS for Electrophilic Attack**

|    |              |              |              |
|----|--------------|--------------|--------------|
| 44 | -0.202835000 | -0.029306000 | 0.788393000  |
| 44 | -0.642450000 | -0.050620000 | -1.598549000 |
| 8  | -1.977439000 | 1.081169000  | 0.945714000  |
| 8  | -2.387625000 | 0.947257000  | -1.261110000 |
| 7  | -0.002313000 | 0.071151000  | 2.547442000  |
| 8  | -1.285304000 | -1.804870000 | 0.872613000  |
| 8  | 0.839668000  | 1.721461000  | 0.411869000  |
| 8  | 1.498387000  | -1.134741000 | 0.373115000  |
| 8  | -1.655691000 | -1.807674000 | -1.345377000 |
| 8  | 0.359501000  | 1.727120000  | -1.785403000 |
| 8  | 1.104733000  | -1.095270000 | -1.842278000 |
| 6  | -2.676060000 | 1.333914000  | -0.080892000 |
| 6  | -1.758418000 | -2.323356000 | -0.185323000 |
| 6  | 0.890661000  | 2.236061000  | -0.747960000 |
| 6  | 1.795067000  | -1.426305000 | -0.828000000 |
| 6  | 1.222537000  | 0.399765000  | 3.695748000  |
| 6  | 1.895973000  | 1.576061000  | 3.176273000  |
| 6  | 2.005543000  | -0.828166000 | 3.679579000  |
| 1  | 1.397924000  | 2.542404000  | 3.275994000  |
| 1  | 1.593032000  | -1.710944000 | 4.172946000  |
| 6  | 3.074544000  | 1.464829000  | 2.466509000  |
| 6  | 3.191649000  | -0.902377000 | 2.986902000  |
| 1  | 3.508362000  | 2.351717000  | 1.998211000  |
| 1  | 3.734062000  | -1.850197000 | 2.946280000  |
| 6  | 3.735655000  | 0.226794000  | 2.325810000  |
| 6  | 4.956047000  | 0.096609000  | 1.462513000  |
| 1  | 5.515885000  | 1.042337000  | 1.398346000  |
| 1  | 5.632148000  | -0.693797000 | 1.823809000  |
| 1  | 4.662518000  | -0.185320000 | 0.435191000  |
| 1  | 0.590134000  | 0.555119000  | 4.575282000  |
| 6  | 3.038507000  | -2.217072000 | -1.061142000 |
| 6  | 3.637504000  | -2.917129000 | -0.002637000 |
| 6  | 3.613951000  | -2.262978000 | -2.340728000 |
| 1  | 3.169027000  | -2.881583000 | 0.980490000  |
| 1  | 3.132356000  | -1.723299000 | -3.157762000 |
| 6  | 4.805493000  | -3.649196000 | -0.219465000 |
| 6  | 4.789527000  | -2.985779000 | -2.551272000 |
| 1  | 5.264679000  | -4.199593000 | 0.605581000  |
| 1  | 5.241157000  | -3.011615000 | -3.546034000 |
| 6  | 5.386741000  | -3.679270000 | -1.492293000 |
| 1  | 6.304756000  | -4.248297000 | -1.660677000 |
| 6  | -2.487160000 | -3.618807000 | -0.058008000 |
| 6  | -2.637401000 | -4.222223000 | 1.201017000  |
| 6  | -3.024042000 | -4.239475000 | -1.197218000 |
| 1  | -2.216525000 | -3.727585000 | 2.077704000  |
| 1  | -2.901366000 | -3.759129000 | -2.169053000 |
| 6  | -3.318163000 | -5.434899000 | 1.317122000  |

|   |              |              |              |
|---|--------------|--------------|--------------|
| 6 | -3.703217000 | -5.452674000 | -1.076631000 |
| 1 | -3.434657000 | -5.901768000 | 2.298365000  |
| 1 | -4.119834000 | -5.933576000 | -1.965159000 |
| 6 | -3.851332000 | -6.051725000 | 0.179518000  |
| 1 | -4.384328000 | -7.001707000 | 0.272243000  |
| 6 | -3.926287000 | 2.127595000  | 0.104527000  |
| 6 | -4.301750000 | 2.560387000  | 1.386485000  |
| 6 | -4.730170000 | 2.445415000  | -1.001807000 |
| 1 | -3.667955000 | 2.304284000  | 2.236860000  |
| 1 | -4.427785000 | 2.101618000  | -1.992063000 |
| 6 | -5.470048000 | 3.304196000  | 1.557862000  |
| 6 | -5.897327000 | 3.190162000  | -0.826015000 |
| 1 | -5.760373000 | 3.638996000  | 2.556870000  |
| 1 | -6.520956000 | 3.436124000  | -1.689118000 |
| 6 | -6.268819000 | 3.620315000  | 0.452892000  |
| 1 | -7.183741000 | 4.203058000  | 0.588906000  |
| 6 | 1.624114000  | 3.526591000  | -0.900373000 |
| 6 | 2.029474000  | 4.248980000  | 0.233343000  |
| 6 | 1.909618000  | 4.025589000  | -2.181012000 |
| 1 | 1.785043000  | 3.859297000  | 1.221365000  |
| 1 | 1.582132000  | 3.459355000  | -3.054262000 |
| 6 | 2.718938000  | 5.453502000  | 0.087236000  |
| 6 | 2.605578000  | 5.227119000  | -2.323645000 |
| 1 | 3.026741000  | 6.015626000  | 0.972444000  |
| 1 | 2.830848000  | 5.609688000  | -3.322208000 |
| 6 | 3.011687000  | 5.942121000  | -1.191216000 |
| 1 | 3.553914000  | 6.884420000  | -1.305161000 |

**Quartet Aziridine-like Intermediate**

|    |              |              |              |
|----|--------------|--------------|--------------|
| 44 | -0.248377000 | 0.004631000  | 0.786436000  |
| 44 | -0.743328000 | 0.040704000  | -1.571429000 |
| 8  | 0.669466000  | 1.839258000  | 0.454716000  |
| 8  | 0.220274000  | 1.822671000  | -1.753543000 |
| 7  | 0.288773000  | -0.115711000 | 2.510008000  |
| 8  | -2.039133000 | 0.979886000  | 1.052690000  |
| 8  | 1.499251000  | -0.958050000 | 0.190852000  |
| 8  | -1.239862000 | -1.817877000 | 0.841709000  |
| 8  | -2.480796000 | 1.010001000  | -1.151709000 |
| 8  | 0.978195000  | -0.933430000 | -2.000720000 |
| 8  | -1.701013000 | -1.737999000 | -1.362005000 |
| 6  | 0.737806000  | 2.342605000  | -0.705318000 |
| 6  | -2.774978000 | 1.277454000  | 0.064350000  |
| 6  | 1.747790000  | -1.227039000 | -1.019761000 |
| 6  | -1.753428000 | -2.298253000 | -0.210264000 |
| 6  | 1.450160000  | 0.182965000  | 3.339616000  |
| 6  | 2.358056000  | 1.267938000  | 2.823882000  |
| 6  | 2.170210000  | -1.126959000 | 3.547724000  |
| 1  | 1.918350000  | 2.259454000  | 2.718087000  |
| 1  | 1.585471000  | -1.947049000 | 3.968492000  |
| 6  | 3.651021000  | 1.029615000  | 2.466764000  |
| 6  | 3.478924000  | -1.301072000 | 3.175547000  |
| 1  | 4.252482000  | 1.848979000  | 2.059166000  |
| 1  | 3.943571000  | -2.281167000 | 3.326347000  |
| 6  | 4.260931000  | -0.256637000 | 2.614815000  |
| 6  | 5.674607000  | -0.481624000 | 2.162874000  |

|   |              |              |              |
|---|--------------|--------------|--------------|
| 1 | 6.339666000  | 0.334911000  | 2.491877000  |
| 1 | 6.081172000  | -1.430095000 | 2.546758000  |
| 1 | 5.738066000  | -0.520067000 | 1.059661000  |
| 1 | 1.000312000  | 0.508204000  | 4.306482000  |
| 6 | 3.020576000  | -1.935724000 | -1.332483000 |
| 6 | 3.393811000  | -2.162125000 | -2.667152000 |
| 6 | 3.849400000  | -2.378572000 | -0.290055000 |
| 6 | 4.590940000  | -2.820177000 | -2.953293000 |
| 6 | 5.044188000  | -3.037730000 | -0.581082000 |
| 6 | 5.417421000  | -3.258095000 | -1.911985000 |
| 1 | 2.738800000  | -1.815476000 | -3.467707000 |
| 1 | 3.542875000  | -2.194266000 | 0.739015000  |
| 1 | 4.881726000  | -2.992822000 | -3.992420000 |
| 1 | 5.687637000  | -3.379922000 | 0.233178000  |
| 1 | 6.354419000  | -3.773578000 | -2.138678000 |
| 6 | 1.473992000  | 3.629440000  | -0.870025000 |
| 6 | 2.093234000  | 4.239377000  | 0.232784000  |
| 6 | 1.557678000  | 4.233088000  | -2.135302000 |
| 6 | 2.788280000  | 5.438236000  | 0.071675000  |
| 6 | 2.252832000  | 5.433031000  | -2.292631000 |
| 6 | 2.868888000  | 6.036978000  | -1.190879000 |
| 1 | 2.023755000  | 3.762102000  | 1.209645000  |
| 1 | 1.074038000  | 3.749809000  | -2.985248000 |
| 1 | 3.268653000  | 5.908555000  | 0.933168000  |
| 1 | 2.315196000  | 5.899795000  | -3.278723000 |
| 1 | 3.413239000  | 6.976629000  | -1.316171000 |
| 6 | -4.059196000 | 1.980221000  | 0.334898000  |
| 6 | -4.432940000 | 2.282215000  | 1.654830000  |
| 6 | -4.900293000 | 2.342054000  | -0.729950000 |
| 6 | -5.637280000 | 2.940582000  | 1.904672000  |
| 6 | -6.103527000 | 3.001116000  | -0.474732000 |
| 6 | -6.473292000 | 3.300874000  | 0.841300000  |
| 1 | -3.770716000 | 1.993980000  | 2.472642000  |
| 1 | -4.598183000 | 2.100522000  | -1.749972000 |
| 1 | -5.926740000 | 3.174013000  | 2.932192000  |
| 1 | -6.756497000 | 3.282143000  | -1.304640000 |
| 1 | -7.416551000 | 3.816739000  | 1.039210000  |
| 6 | -2.467040000 | -3.602634000 | -0.107925000 |
| 6 | -2.565119000 | -4.254336000 | 1.132477000  |
| 6 | -3.042563000 | -4.183458000 | -1.249558000 |
| 6 | -3.233124000 | -5.475513000 | 1.227441000  |
| 6 | -3.709421000 | -5.405326000 | -1.149473000 |
| 6 | -3.805604000 | -6.052328000 | 0.087683000  |
| 1 | -2.113476000 | -3.790547000 | 2.010800000  |
| 1 | -2.958858000 | -3.666704000 | -2.206630000 |
| 1 | -3.308705000 | -5.980688000 | 2.193506000  |
| 1 | -4.156281000 | -5.855696000 | -2.039236000 |
| 1 | -4.328535000 | -7.009301000 | 0.164111000  |

**Quartet 1,2 H transfer TS**

|    |              |              |              |
|----|--------------|--------------|--------------|
| 44 | 0.194529000  | 0.010886000  | 0.632259000  |
| 44 | 0.971454000  | 0.001485000  | -1.631169000 |
| 8  | -1.069122000 | -1.523341000 | 0.048924000  |
| 8  | -0.323114000 | -1.512842000 | -2.074328000 |
| 7  | -0.601427000 | -0.038397000 | 2.347780000  |

|   |              |              |              |
|---|--------------|--------------|--------------|
| 8 | 1.665714000  | -1.375023000 | 1.044818000  |
| 8 | -1.202421000 | 1.392556000  | -0.010391000 |
| 8 | 1.526676000  | 1.538809000  | 0.992403000  |
| 8 | 2.382340000  | -1.355530000 | -1.089917000 |
| 8 | -0.459310000 | 1.362481000  | -2.135377000 |
| 8 | 2.244079000  | 1.501848000  | -1.141458000 |
| 6 | -1.089596000 | -1.945194000 | -1.147379000 |
| 6 | 2.444536000  | -1.762258000 | 0.124394000  |
| 6 | -1.262568000 | 1.759308000  | -1.221252000 |
| 6 | 2.265515000  | 1.962626000  | 0.055415000  |
| 1 | -1.494654000 | -1.295250000 | 2.568611000  |
| 6 | -3.121494000 | -0.068437000 | 1.856037000  |
| 6 | -1.959243000 | -0.219538000 | 2.745967000  |
| 6 | -4.395425000 | 0.052915000  | 2.366285000  |
| 1 | -5.233335000 | 0.140550000  | 1.667013000  |
| 6 | -2.263359000 | -0.143004000 | 4.181748000  |
| 6 | -4.660834000 | 0.080901000  | 3.757630000  |
| 1 | -1.418968000 | -0.204999000 | 4.871355000  |
| 6 | -3.555750000 | -0.018497000 | 4.638793000  |
| 1 | -3.734261000 | 0.017480000  | 5.717965000  |
| 1 | -2.948970000 | -0.087585000 | 0.783176000  |
| 6 | -6.062988000 | 0.256683000  | 4.273093000  |
| 1 | -6.368250000 | 1.319350000  | 4.244584000  |
| 1 | -6.792382000 | -0.299997000 | 3.662550000  |
| 1 | -6.160197000 | -0.081818000 | 5.315975000  |
| 6 | 3.501326000  | -2.754156000 | 0.469208000  |
| 6 | 4.375531000  | -3.227747000 | -0.522539000 |
| 6 | 3.626403000  | -3.217439000 | 1.789369000  |
| 6 | 5.363967000  | -4.157000000 | -0.195257000 |
| 6 | 4.616628000  | -4.145931000 | 2.111726000  |
| 6 | 5.485895000  | -4.616972000 | 1.120797000  |
| 1 | 4.268221000  | -2.859092000 | -1.543631000 |
| 1 | 2.941693000  | -2.839143000 | 2.550033000  |
| 1 | 6.042830000  | -4.524312000 | -0.968845000 |
| 1 | 4.712578000  | -4.504187000 | 3.139660000  |
| 1 | 6.261167000  | -5.344462000 | 1.375347000  |
| 6 | 3.220808000  | 3.064529000  | 0.357094000  |
| 6 | 3.286730000  | 3.601463000  | 1.653465000  |
| 6 | 4.057450000  | 3.569517000  | -0.651453000 |
| 6 | 4.181887000  | 4.633708000  | 1.935620000  |
| 6 | 4.950980000  | 4.602273000  | -0.364124000 |
| 6 | 5.014483000  | 5.135257000  | 0.928299000  |
| 1 | 2.630906000  | 3.199164000  | 2.427148000  |
| 1 | 3.996300000  | 3.143465000  | -1.653840000 |
| 1 | 4.231625000  | 5.049784000  | 2.944863000  |
| 1 | 5.601016000  | 4.993721000  | -1.150520000 |
| 1 | 5.715186000  | 5.944140000  | 1.151493000  |
| 6 | -2.348771000 | 2.704712000  | -1.603319000 |
| 6 | -3.294533000 | 3.109306000  | -0.645951000 |
| 6 | -2.437720000 | 3.184283000  | -2.919900000 |
| 6 | -4.318578000 | 3.985808000  | -1.006122000 |
| 6 | -3.462437000 | 4.063147000  | -3.274000000 |
| 6 | -4.403325000 | 4.464525000  | -2.318863000 |
| 1 | -3.216923000 | 2.725496000  | 0.372697000  |
| 1 | -1.697680000 | 2.859677000  | -3.652869000 |



|   |              |              |              |
|---|--------------|--------------|--------------|
| 1 | -5.053803000 | 4.298579000  | -0.260542000 |
| 1 | -3.528868000 | 4.436850000  | -4.298750000 |
| 1 | -5.205578000 | 5.152489000  | -2.598469000 |
| 6 | -2.078838000 | -3.004222000 | -1.492527000 |
| 6 | -2.080179000 | -3.575530000 | -2.775252000 |
| 6 | -3.020878000 | -3.426149000 | -0.539345000 |
| 6 | -3.011610000 | -4.563390000 | -3.097884000 |
| 6 | -3.952904000 | -4.410889000 | -0.868092000 |
| 6 | -3.948289000 | -4.982008000 | -2.146044000 |
| 1 | -1.345569000 | -3.235841000 | -3.506789000 |
| 1 | -3.017846000 | -2.968407000 | 0.451021000  |
| 1 | -3.008593000 | -5.008695000 | -4.095783000 |
| 1 | -4.686517000 | -4.734881000 | -0.125807000 |
| 1 | -4.678044000 | -5.754862000 | -2.401277000 |

#### Quartet-Ru<sub>2</sub>NCl Product

|    |              |              |              |
|----|--------------|--------------|--------------|
| 44 | 0.000134000  | -0.000059000 | 1.029833000  |
| 44 | 0.000129000  | -0.000069000 | -1.283375000 |
| 8  | -1.446638000 | 1.447148000  | 0.951494000  |
| 8  | -1.426887000 | 1.427418000  | -1.291142000 |
| 17 | 0.000141000  | 0.000047000  | 3.383184000  |
| 8  | -1.447197000 | -1.446712000 | 0.951478000  |
| 8  | 1.447389000  | 1.446663000  | 0.951436000  |
| 8  | 1.446863000  | -1.447295000 | 0.951460000  |
| 8  | -1.427470000 | -1.426970000 | -1.291163000 |
| 8  | 1.427622000  | 1.426952000  | -1.291206000 |
| 8  | 1.427120000  | -1.427574000 | -1.291175000 |
| 6  | -1.867387000 | 1.868018000  | -0.165271000 |
| 6  | -1.868160000 | -1.867362000 | -0.165290000 |
| 6  | 1.868262000  | 1.867395000  | -0.165333000 |
| 6  | 1.867572000  | -1.868214000 | -0.165310000 |
| 6  | 2.917628000  | 2.916475000  | -0.182141000 |
| 6  | 3.420102000  | 3.419130000  | 1.030109000  |
| 6  | 3.408493000  | 3.406869000  | -1.403471000 |
| 6  | 4.406513000  | 4.405219000  | 1.016476000  |
| 6  | 4.395154000  | 4.393190000  | -1.410085000 |
| 6  | 4.894511000  | 4.892727000  | -0.201690000 |
| 1  | 3.028652000  | 3.028034000  | 1.970714000  |
| 1  | 3.009495000  | 3.007744000  | -2.337113000 |
| 1  | 4.797117000  | 4.795954000  | 1.959068000  |
| 1  | 4.777010000  | 4.774638000  | -2.360128000 |
| 1  | 5.667578000  | 5.665525000  | -0.209275000 |
| 6  | -2.916407000 | 2.917435000  | -0.182089000 |
| 6  | -3.418879000 | 3.420096000  | 1.030162000  |
| 6  | -3.406940000 | 3.408163000  | -1.403419000 |
| 6  | -4.404940000 | 4.406535000  | 1.016530000  |
| 6  | -4.393242000 | 4.394843000  | -1.410032000 |
| 6  | -4.892597000 | 4.894382000  | -0.201637000 |
| 1  | -3.027679000 | 3.028749000  | 1.970766000  |
| 1  | -3.007948000 | 3.009031000  | -2.337060000 |
| 1  | -4.795534000 | 4.797281000  | 1.959121000  |
| 1  | -4.774816000 | 4.776574000  | -2.360074000 |
| 1  | -5.665379000 | 5.667465000  | -0.209224000 |
| 6  | -2.917828000 | -2.916138000 | -0.182099000 |
| 6  | -3.408828000 | -3.406398000 | -1.403428000 |

|   |              |              |              |
|---|--------------|--------------|--------------|
| 6 | -3.420458000 | -3.418636000 | 1.030153000  |
| 6 | -4.395771000 | -4.392438000 | -1.410040000 |
| 6 | -4.407153000 | -4.404440000 | 1.016521000  |
| 6 | -4.895282000 | -4.891819000 | -0.201644000 |
| 1 | -3.009711000 | -3.007394000 | -2.337070000 |
| 1 | -3.028901000 | -3.027646000 | 1.970756000  |
| 1 | -4.777726000 | -4.773788000 | -2.360083000 |
| 1 | -4.797879000 | -4.795053000 | 1.959113000  |
| 1 | -5.668570000 | -5.664396000 | -0.209229000 |
| 6 | 2.916481000  | -2.917742000 | -0.182109000 |
| 6 | 3.406915000  | -3.408578000 | -1.403434000 |
| 6 | 3.418941000  | -3.420405000 | 1.030147000  |
| 6 | 4.393105000  | -4.395371000 | -1.410041000 |
| 6 | 4.404893000  | -4.406952000 | 1.016521000  |
| 6 | 4.892451000  | -4.894910000 | -0.201642000 |
| 1 | 3.007935000  | -3.009443000 | -2.337079000 |
| 1 | 3.027818000  | -3.028976000 | 1.970748000  |
| 1 | 4.774599000  | -4.777189000 | -2.360080000 |
| 1 | 4.795481000  | -4.797697000 | 1.959115000  |
| 1 | 5.665146000  | -5.668079000 | -0.209224000 |

#### Singlet Benzylamine

|   |              |              |              |
|---|--------------|--------------|--------------|
| 1 | 0.078528000  | -2.311598000 | 0.027873000  |
| 6 | -1.918679000 | -0.480018000 | -0.377024000 |
| 1 | -2.120917000 | -1.553772000 | -0.189063000 |
| 1 | -2.179184000 | -0.298049000 | -1.435355000 |
| 6 | -0.437154000 | -0.223332000 | -0.184608000 |
| 6 | 0.068471000  | 1.087162000  | -0.205099000 |
| 6 | 1.435961000  | 1.324580000  | -0.051577000 |
| 6 | 2.322599000  | 0.255758000  | 0.125527000  |
| 6 | 1.829706000  | -1.051278000 | 0.151065000  |
| 6 | 0.458524000  | -1.285806000 | 0.000362000  |
| 1 | -0.627366000 | 1.919293000  | -0.334489000 |
| 1 | 1.814351000  | 2.350280000  | -0.070360000 |
| 1 | 3.392826000  | 0.442830000  | 0.246472000  |
| 1 | 2.512675000  | -1.892826000 | 0.294740000  |
| 7 | -2.734066000 | 0.430957000  | 0.432115000  |
| 1 | -2.566898000 | 0.280268000  | 1.420934000  |
| 1 | -3.722123000 | 0.284481000  | 0.262567000  |

#### Singlet p-Toluidine

|   |              |              |              |
|---|--------------|--------------|--------------|
| 1 | 1.206161000  | 2.153430000  | -0.020187000 |
| 6 | 2.914160000  | -0.000466000 | 0.007340000  |
| 1 | 3.327246000  | 0.906154000  | -0.462198000 |
| 1 | 3.326486000  | -0.873104000 | -0.523740000 |
| 1 | 3.302637000  | -0.036987000 | 1.041003000  |
| 6 | 1.404407000  | 0.000903000  | -0.014684000 |
| 6 | 0.672769000  | -1.197195000 | -0.010364000 |
| 6 | -0.721849000 | -1.205680000 | 0.002740000  |
| 6 | -1.445691000 | 0.000195000  | 0.010617000  |
| 6 | -0.722769000 | 1.205895000  | 0.002709000  |
| 6 | 0.672514000  | 1.198055000  | -0.010369000 |
| 1 | 1.207244000  | -2.152133000 | -0.020592000 |
| 1 | -1.261368000 | -2.157531000 | 0.006824000  |
| 1 | -1.262139000 | 2.157813000  | 0.006588000  |

|   |              |              |              |
|---|--------------|--------------|--------------|
| 7 | -2.841832000 | -0.000813000 | 0.078159000  |
| 1 | -3.296795000 | -0.837550000 | -0.251368000 |
| 1 | -3.297894000 | 0.835356000  | -0.251372000 |

## F. References

1. A. Das, A. G. Maher, J. Telser and D. C. Powers, *J. Am. Chem. Soc.*, 2018, **140**, 10412–10415.
2. G. R. Fulmer, A. J. M. Miller, N. H. Sherden, H. E. Gottlieb, A. Nudelman, B. M. Stoltz, J. E. Bercaw and K. I. Goldberg, *Organometallics*, 2010, **29**, 2176–2179.
3. SADABS, Sheldrick, G.M. “*Program for Absorption Correction of Area Detector Frames*”, BRUKER AXS Inc., 5465 East Cheryl Parkway, Madison, WI 53711-5373 USA.
4. G. Sheldrick, *Acta Cryst*, 2015, **71**, 3–8.
5. G. Sheldrick, *Acta Cryst*, 2008, **64**, 112–122.
6. O. V. Dolomanov, L. J. Bourhis, R. J. Gildea, J. A. K. Howard and H. Puschmann, *J. Appl. Crystallogr.*, 2009, **42**, 339–341.
7. M.J. Frisch, G.W. Trucks, H.B. Schlegel, G.E. Scuseria, M.A. Robb, J.R. Cheeseman, G. Scalmani, V. Barone, G.A. Petersson, H. Nakatsuji, X. Li, M. Caricato, A.V. Marenich, J. Bloino, B.G. Janesko, R. Gomperts, B. Mennucci, H.P. Hratchian, J.V. Ortiz, A.F. Izmaylov, J.L. Sonnenberg, D. Williams-Young, F. Ding, F. Lipparini, F. Egidi, J. Goings, B. Peng, A. Petrone, T. Henderson, D. Ranasinghe, V.G. Zakrzewski, J. Gao, N. Rega, G. Zheng, W. Liang, M. Hada, M. Ehara, K. Toyota, R. Fukuda, J. Hasegawa, M. Ishida, T. Nakajima, Y. Honda, O. Kitao, H. Nakai, T. Vreven, K. Throssell, J.A. Montgomery Jr., J.E. Peralta, F. Ogliaro, M.J. Bearpark, J.J. Heyd, E.N. Brothers, K.N. Kudin, V.N. Staroverov, T.A. Keith, R. Kobayashi, J. Normand, K. Raghavachari, A.P. Rendell, J.C. Burant, S.S. Iyengar, J. Tomasi, M. Cossi, J.M. Millam, M. Klene, C. Adamo, R. Cammi, J.W. Ochterski, R.L. Martin, K. Morokuma, O. Farkas, J.B. Foresman, D.J. Fox Gaussian 16, Revision B.01 Gaussian, Inc., Wallingford CT (2016) Gaussian 16 software.
8. Chemcraft - graphical software for visualization of quantum chemistry computations. <https://www.chemcraftprog.com>.
9. A. D. Becke, *J. Chem. Phys.*, 1993, **98**, 5648–5652.
10. S. Grimme, J. Antony, S. Ehrlich and H. Krieg, *J. Chem. Phys.*, 2010, **132**, 154104.
11. B. P. Pritchard, D. Altarawy, B. Didier, T. D. Gibson and T. L. Windus, *J Chem Inf Model*, 2019, **59**, 4814–4820.
12. A. V. Marenich, C. J. Cramer and D. G. Truhlar, *J. Phys. Chem. B*, 2009, **113**, 6378–6396.
13. M. E. Harvey, D. G. Musaev and J. Du Bois, *J. Am. Chem. Soc.*, 2011, **133**, 17207–17216.
